# Supplementary material
Source: Frontiers journal article supplement (https://www.frontiersin.org/articles/497368)
Supplement: Data_Sheet_1.PDF [file Data_Sheet_1.PDF]

# VIRTUAL REALITY NEUROSCIENCE QUESTIONNAIRE

Please, from 1 to 7, **circle** the response that closely represents your opinion.

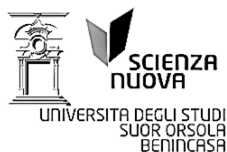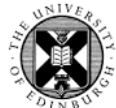

THE UNIVERSITY of EDINBURGH  
School of Philosophy, Psychology  
and Language Sciences

## User Experience

What is the level of immersion you experienced?

1                      2                      3                      4                      5                      6                      7

Extremely Low      Very Low              Low                      Neutral                  High                      Very High              Extremely High

Please write below any additional comments and/or suggestions relevant to the question above:

What was your level of enjoyment of the VR experience?

1                      2                      3                      4                      5                      6                      7

Extremely Low      Very Low              Low                      Neutral                  High                      Very High              Extremely High

Please write below any additional comments and/or suggestions relevant to the question above:

How was the quality of the graphics?

1

2

3

4

5

6

7

Extremely Low

Very Low

Low

Neutral

High

Very High

Extremely High

Please write below any additional comments and/or suggestions relevant to the question above:

How was the quality of the sound?

1

2

3

4

5

6

7

Extremely Low

Very Low

Low

Neutral

High

Very High

Extremely High

Please write below any additional comments and/or suggestions relevant to the question above:

How was the quality of the VR technology overall (i.e. hardware & peripherals)?

1

2

3

4

5

6

7

Extremely Low

Very Low

Low

Neutral

High

Very High

Extremely High

Please write below any additional comments and/or suggestions relevant to the question above:

## Game Mechanics

How easy was to use the navigation system (e.g. teleportation) in the virtual environment?

1                      2                      3                      4                      5                      6                      7

Extremely Difficult   Very Difficult   Difficult   Neutral   Easy   Very Easy   Extremely Easy

Please write below any additional comments and/or suggestions relevant to the question above:

How easy was to physically move in the virtual environment?

1                      2                      3                      4                      5                      6                      7

Extremely Difficult   Very Difficult   Difficult   Neutral   Easy   Very Easy   Extremely Easy

Please write below any additional comments and/or suggestions relevant to the question above:

How easy was to pick up and/or place items in the virtual environment?

1                      2                      3                      4                      5                      6                      7

Extremely Difficult   Very Difficult   Difficult   Neutral   Easy   Very Easy   Extremely Easy

Please write below any additional comments and/or suggestions relevant to the question above:

How easy was to use items in the virtual environment?

1

2

3

4

5

6

7

Extremely Difficult

Very Difficult

Difficult

Neutral

Easy

Very Easy

Extremely Easy

Please write below any additional comments and/or suggestions relevant to the question above:

How easy was the 2-handed interaction e.g., grab the tablet with the one hand, and push the button with the other hand?

1

2

3

4

5

6

7

Extremely Difficult

Very Difficult

Difficult

Neutral

Easy

Very Easy

Extremely Easy

Please write below any additional comments and/or suggestions relevant to the question above:

## **In-Game Assistance**

How easy was to complete the tutorial(s)?

1

2

3

4

5

6

7

Extremely Difficult

Very Difficult

Difficult

Neutral

Easy

Very Easy

Extremely Easy

Please write below any additional comments and/or suggestions relevant to the question above:

How helpful was/were the tutorial(s)?

1

2

3

4

5

6

7

Extremely Unhelpful   Very Unhelpful   Unhelpful   Neutral   Helpful   Very Helpful   Extremely Helpful

Please write below any additional comments and/or suggestions relevant to the question above:

How did you feel about the duration of the tutorial(s)?

1

2

3

4

5

6

7

Extremely More   Much More   More   Neutral   Enough Time   Much Time   Plenty of Time  
Time Needed   Time Needed   Time Needed   Available   Available   Available

Please write below any additional comments and/or suggestions relevant to the question above:

How helpful were the in-game instructions for the task you needed to perform?

1

2

3

4

5

6

7

Extremely Unhelpful   Very Unhelpful   Unhelpful   Neutral   Helpful   Very Helpful   Extremely Helpful

Please write below any additional comments and/or suggestions relevant to the question above:

How helpful were the in-game prompts e.g. arrows showing the direction, or labels?

1 2 3 4 5 6 7

Extremely Unhelpful Very Unhelpful Unhelpful Neutral Helpful Very Helpful Extremely Helpful

Please write below any additional comments and/or suggestions relevant to the question above:

### VR Induced Symptoms and Effects (VRISE)

Did you experience nausea?

1 2 3 4 5 6 7

Extremely Intense Very Intense Intense Moderate Mild Very Mild Absent

Feeling Feeling Feeling Feeling Feeling Feeling

Please write below any additional comments and/or suggestions relevant to the question above:

Did you experience disorientation?

1 2 3 4 5 6 7

Extremely Intense Very Intense Intense Moderate Mild Very Mild Absent

Feeling Feeling Feeling Feeling Feeling Feeling

Please write below any additional comments and/or suggestions relevant to the question above:

Did you experience dizziness?

|                   |              |         |          |         |           |        |
|-------------------|--------------|---------|----------|---------|-----------|--------|
| 1                 | 2            | 3       | 4        | 5       | 6         | 7      |
| Extremely Intense | Very Intense | Intense | Moderate | Mild    | Very Mild | Absent |
| Feeling           | Feeling      | Feeling | Feeling  | Feeling | Feeling   |        |

Please write below any additional comments and/or suggestions relevant to the question above:

Did you experience fatigue?

|                   |              |         |          |         |           |        |
|-------------------|--------------|---------|----------|---------|-----------|--------|
| 1                 | 2            | 3       | 4        | 5       | 6         | 7      |
| Extremely Intense | Very Intense | Intense | Moderate | Mild    | Very Mild | Absent |
| Feeling           | Feeling      | Feeling | Feeling  | Feeling | Feeling   |        |

Please write below any additional comments and/or suggestions relevant to the question above:

Did you experience instability?

|                   |              |         |          |         |           |        |
|-------------------|--------------|---------|----------|---------|-----------|--------|
| 1                 | 2            | 3       | 4        | 5       | 6         | 7      |
| Extremely Intense | Very Intense | Intense | Moderate | Mild    | Very Mild | Absent |
| Feeling           | Feeling      | Feeling | Feeling  | Feeling | Feeling   |        |

Please write below any additional comments and/or suggestions relevant to the question above:

## Virtual Reality Neuroscience Questionnaire (VRNQ) – Scores

| Section            | Score | Minimum Cut-offs | Parsimonious Cut-offs |
|--------------------|-------|------------------|-----------------------|
| User Experience    |       | $\geq 25$        | $\geq 30$             |
|                    |       |                  |                       |
| Game Mechanics     |       | $\geq 25$        | $\geq 30$             |
|                    |       |                  |                       |
| In-Game Assistance |       | $\geq 25$        | $\geq 30$             |
|                    |       |                  |                       |
| VRISE              |       | $\geq 25$        | $\geq 30$             |
|                    |       |                  |                       |
| <u>Total VRNQ</u>  |       | $\geq 100$       | $\geq 120$            |

The median of each sub-score and totals score should meet the suggested cut-offs to support that the evaluated VR software has an adequate quality without any significant VRISE.

The utilisation of the parsimonious cut-offs more robustly supports the suitability of the VR software.

The VR Neuroscience Questionnaire (VRNQ) was developed by Panagiotis Kourtesis

in affiliation with University of Edinburgh & University Suor Orsola Benincasa of Naples.

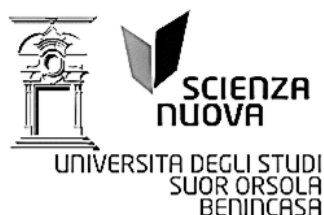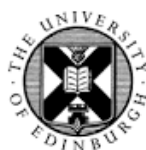

THE UNIVERSITY *of* EDINBURGH  
School of Philosophy, Psychology  
and Language Sciences
