# Supplementary material
Source: Frontiers journal article supplement (https://www.frontiersin.org/articles/497368)
Supplement: Table_1.DOCX [file Table_1.DOCX]

Table 1. VR-EAL Collected Data Sample

| Scene - 1 - Tutorial Basic Interactions | |
| --- | --- |
| Tutorial Time = 125.9119 |  |
| Scene - 2 - Tutorial - Interactive Boards | |
| Interactive Boards Tutorial Time = 262.7656 | |
| Scene - 3 Bedroom - Immediate Recognition & Planning | |
| PM Intro Notes Score = 6 | Immediate Specific Memory Score = 18 |
| Planning/Thinking Time = 6.042221 | Immediate Qualitative Memory Score = 0 |
| Immediate Recognition Time = 3.059387 | Imm. Quantitative Memory Score = 0 |
| Map Planning Time = 32.21278 | Immediate Proxy Memory Score = 0 |
| Scene Time Bedroom = 273.2998 | Immediate Memory Total Score = 18 |
|  | Planning Map Score = 15 |
| Scene - 4-Tutorial Prospective Memory | |
| PM Tutorial Time = 115.6898 |  |
| Scene - 5 -Tutorial Cooking | |
| Tutorial Cooking Time = 223.2638 |  |
| Scene - 6-Kitchen Cooking Task (Multitasking) | |
| Cooking Score = 11 | PM Meds Score = 6 |
| Task Time = 53.27881 | Times Notes Used = 2 |
| Scene Time = 97.93003 | Time Spent Reading the Notes = 7.584717 |
| Scene - 7-Tutorial Collect Items | |
| Collect Items Tutorial Time = 214.8167 |  |
| Scene - 8-LivingRoom Collect Items (Selective Visuospatial Attention) | |
| Visuospatial Attention Score = 6 | Times Notes Used = 2 |
| Task Living-Room Time = 39.93291 | Time Spent Reading the Notes = 4.232811 |
| Selective Attention Mistakes = 3 | Scene Living-Room Time = 90.64527 |
| PM_PIE Score = 6 |  |
| Scene - 9-Tutorial Interact With 3D Characters | |
| Tutorial Time = 148.2682 |  |
| Scene - 10 - PM Task (Meet Alex) | |
| PM Score = 4 | Time Spent Reading the Notes = 18.1607 |
| Times Notes Used = 6 | Scene Time = 70.98004 |
| Scene - 11-Tutorial Gaze Interaction |  |
| Gaze Tutorial Total Time = 185.7015 | Times of Practicing Gaze Interaction = 1 |
| Scene - 12- On the Road (Selective Visual Attention i.e., SVA; Spot the Targets) | |
| SVA Score = 13 | SVA Distractor (Same Shape) = 0 |
| SVA Correct on Right = 6 | SVA Distractor (Same Colour) Right = 0 |
| SVA Correct on Left = 7 | SVA Distractor (Same Colour) Left = 0 |
| SVA Correct = 13 | SVA Distractor (Same Colour) = 0 |
| SVA Distractor (Same Shape) Right = 0 | Total Time of the scene = 192.9267 |
| SVA Distractor (Same Shape) Left= 0 |  |
| Scene - 13 -Tutorial Shopping | |
| Collect Items Tutorial Time = 87.6929 |  |
| Scene - 14 - Supermarket: Delayed Recognition Task | |
| Delayed Recognition Score = 20 | Task Time = 142.6777 |
| Specific Memory = 10 | Times Notes Used = 2 |
| Proxy Memory = 0 | Time Spent Reading the Notes = 8.08563 |
| Qualitative Distraction = 0 | Scene Time = 189.6496 |
| Quantitative Distraction = 0 |  |
| Scene - 15 - Supermarket (Outside): Prospective Memory Task | |
| PM Score = 6 | Time Spent Reading the Notes = 13.48413 |
| Times Notes Used = 2 | Scene Time = 33.99336 |
| Scene - 16 - Bakery: Prospective Memory Task | |
| PM Score = 0 | Time Spent Reading the Notes = 25.3338 |
| Times Notes Used = 3 | Scene Time = 67.80582 |
| Scene - 17 - Library: Prospective Memory Task | |
| PM Score = 6 | Time Spent Reading the Notes = 0 |
| Times Notes Used = 0 | Scene Time = 26.94465 |
| Scene - 18 - Auditory Attention Tutorial | |
| Times to Practice = 1 | Tutorial Time = 181.7337 |
| Scene - 19 – On the Road (Selective Auditory Attention) | |
| Scene Time = 217.0072 | False Sounds = 0 |
| Auditory Attention Scene Time = 224.241 | False Sounds on The Right = 0 |
| Auditory Attention Score = 28 | False Sounds on The Left = 0 |
| Sum of Sounds Detected = 14 | Distractor - High Pitch Sounds = 0 |
| Sounds Detected by False Controller = 0 | Distractor - High Pitch Right = 0 |
| Sounds on The Right Side, Left Cont. = 0 | Distractor - High Pitch Left = 0 |
| Sounds on The Left Side Right Cont. = 0 | Distractor - Low Pitch Sounds = 0 |
| Correct Sounds = 14 | Distractor - Low Pitch Right = 0 |
| Correct Sounds on The Right = 7 | Distractor - Low Pitch Left = 0 |
| Correct Sounds on The Left = 7 |  |
| Scene - 21 - Back Home - Prospective Memory Task | |
| PM Score = 3 Semantic Mistake(!) = 1 | Times Notes Used = 2 |
| Scene Time = 29.7544 | Time Spent Reading the Notes = 4.968964 |
| Scene - 22 - Final Scene - Back Home - Prospective Memory Task | |
| Total Time - Sorting Task = 67.71269 | Times Notes Used = 0 |
| Meds (Time) Final Scene - PM Score = 6 | Time Spent Reading the Notes = 0 |
|  | Scene Time = 90.33228 |
